# Supplementary material
Source: PubMed Central journal article supplement (PMC4999932)
Supplement: JB.00381-16_zjb999094160so1.pdf [file JB.00381-16_zjb999094160so1.pdf]

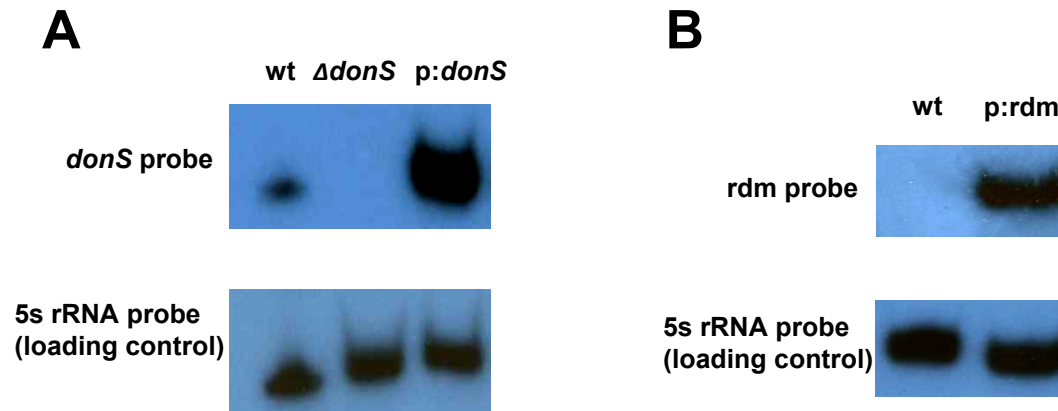

**Supplementary Figure 1. Verification of sRNA mutants and constructs.** Autoradiographs showing sRNA expression in *B. fragilis* 638R strains. **A.** DonS expression in the wild type strain (wt), *donS* null mutant ( $\Delta donS$ ), *donS* overexpression strain, pUC2:*donS* (p:*donS*). **B.** Overexpression of the random sRNA (p:rdm). For each autoradiograph 10  $\mu$ g of total RNA was analyzed by northern hybridization using  $\gamma$ - $^{32}$ P labeled probes for each sRNA. The 5s rRNA was used as a loading control.

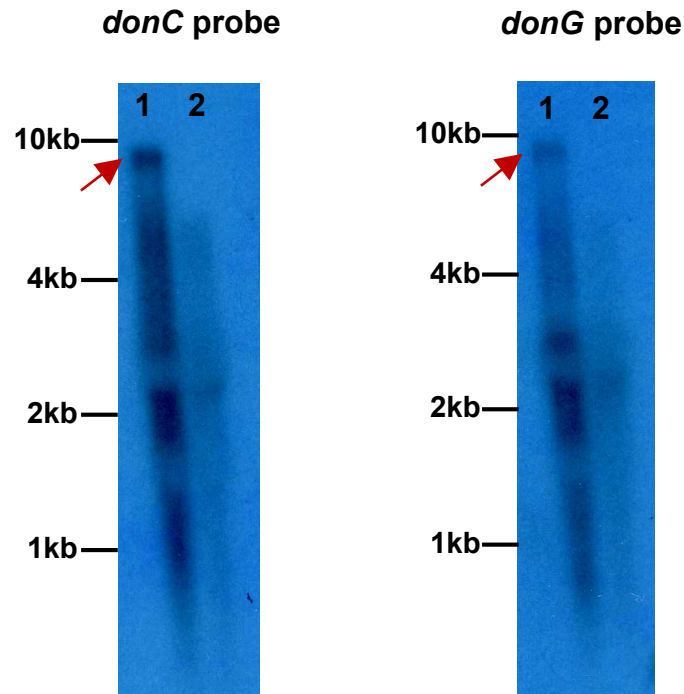

**Supplementary Figure 2. Northern analysis of *don* expression when *donS* is overexpressed.** Autoradiographs of *donBCDEFG* expression in the *B. fragilis* wild type strain 638R (Lane 1), and *donS* overexpression strain, pYC2:*donS* (Lane 2). 30  $\mu$ g of total RNA was analyzed by northern hybridization using  $\alpha$ - $^{32}$ P labeled probes for detection of *donC* or *donG* mRNA. 16s rRNA was used as a loading control. The full length transcript for the *donBCDEFG* operon is predicted to be 9.5 kb (arrowhead). The full length mRNA is subject to degradation as seen by the diffuse smear of RNA below the intact message. Also note the compression artifacts caused by the high concentration of 16S and 23S rRNA.

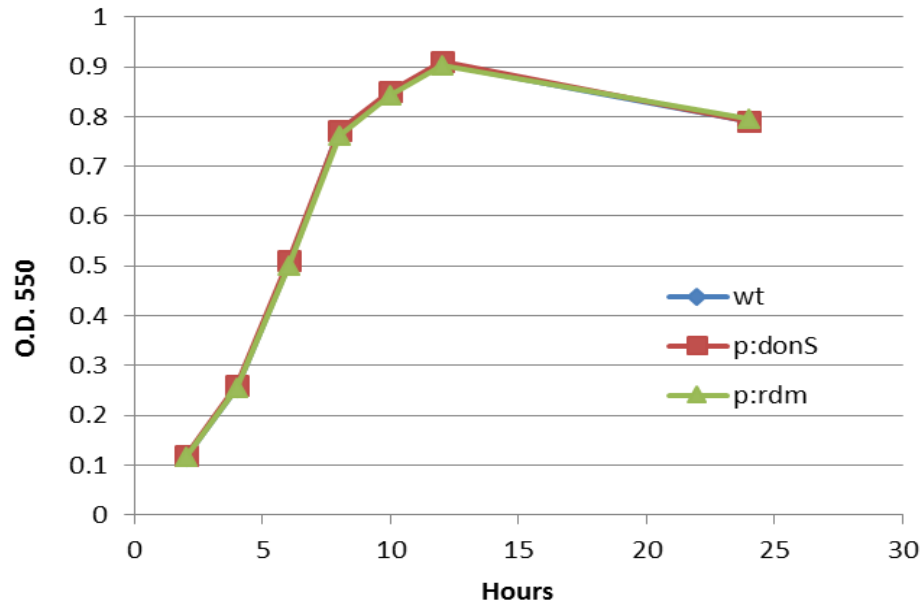

**Supplementary Figure 3.** Growth curves for the wild type strain, 638R (wt), *donS* overexpression strain pYC2:*donS* (p:donS) and random sRNA overexpression strain pYC3:rdm (p:rdm) grown in DM-glucose media. An overnight inoculum of 2% was used and the OD A<sub>550</sub> was measured at specific time intervals. All experiments represent two biological repeat. Error bars are standard deviation.

**A.**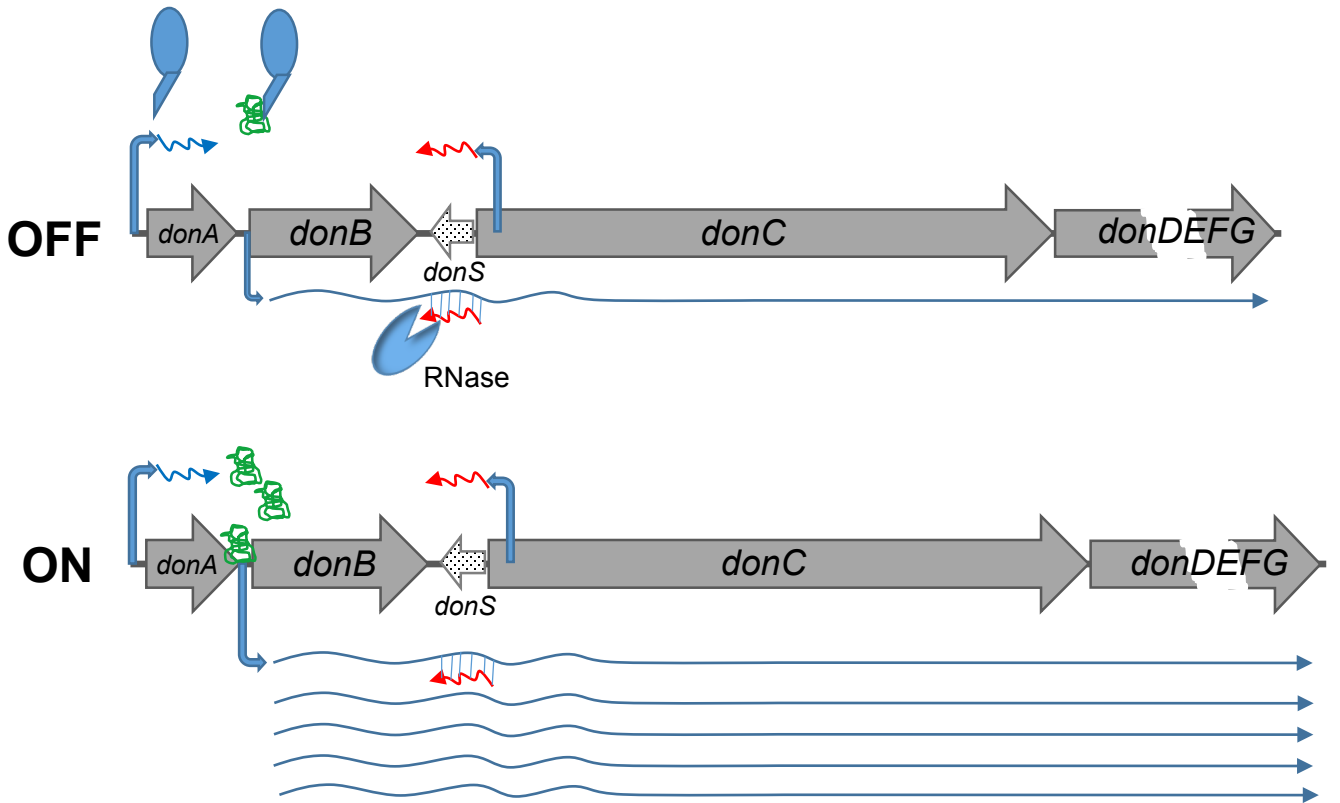**B.**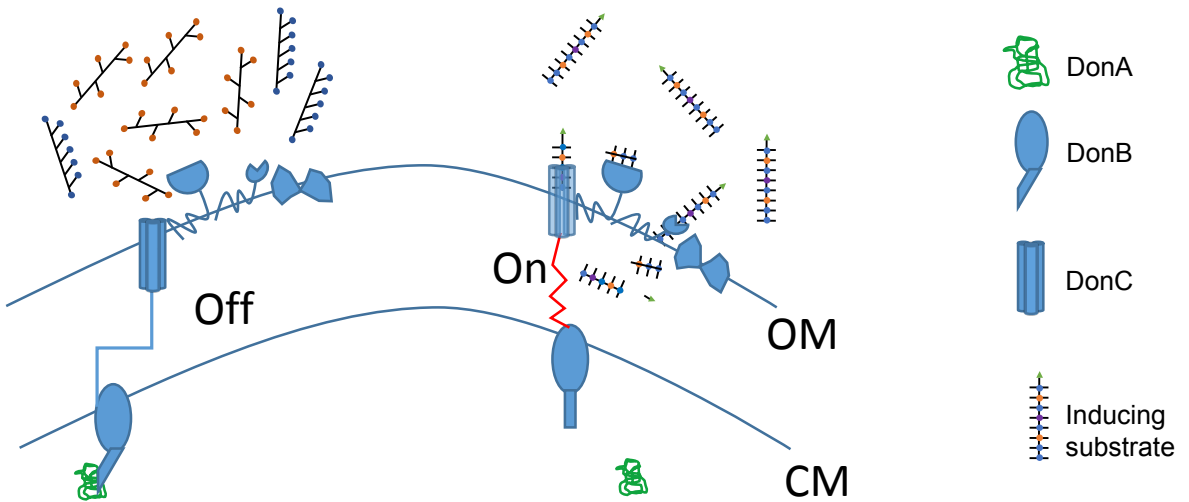

**Supplementary Figure 4. Model of Don Regulation.** A) Transcriptional organization of the Don locus with and without induction. B) The Don protein complex in the absence and presence of inducing substrate.

1. Don OFF: In the absence of inducing substrate the sigma factor DonA ( $\sigma^{\text{DonA}}$ ) is sequestered by the antisigma factor DonB. A low level of *donBCDEFG* transcript is produced (from a consensus house keeping sigma factor promoter upstream of *donB*). DonS is constitutively transcribed at a low to moderate level during logarithmic phase growth. The levels of DonS likely will exceed the low levels of the *donBCDEFG* message. This will favor base pairing of DonS and the *donBCDEFG* message which will prevent translation and eventually target the RNA complex for degradation. It is expected that there is a very low rate of *donCDEFG* translation that is required for surveillance of the environment for substrate.

2. Don ON: In the presence of inducing substrate, transport of substrate through DonC causes a conformational change in DonB which releases  $\sigma^{\text{DonA}}$  and results in a large induction of *donBCDEFG* mRNA such that it greatly exceeds the level of DonS. The ratio of DonS to *donBCDEFG* mRNA remains low in the presence of substrate and this allows for significant translation and amplification of the Don PUL protein complex. In addition it is equally likely that the levels of DonS are kept low by the very act of transcription of the *donBCDEFG* operon. That is, the extremely high rate of *donBCDEFG* transcription driven by  $\sigma^{\text{DonA}}$  may cause transcriptional interference of *donS* via a mechanism of collision of opposing RNA polymerases.

3. Don repression: As the concentration of inducing substrate decreases, DonC remains inactive for longer periods of time allowing DonB to revert back to its repressing conformation and sequester  $\sigma^{\text{DonA}}$ . As the ratio of DonS/*donBCDEFG* increases there is a rapid decline in the production of the Don PUL such that it will quickly reach an equilibrium with the concentration of substrate.

**Supplemental Table 1.** Oligonucleotides used in this study<sup>a</sup>.

| Name                   | Sequence ( 5' → 3')                                                               | Description                                                                                                  |
|------------------------|-----------------------------------------------------------------------------------|--------------------------------------------------------------------------------------------------------------|
| sigOK+2kL              | AGTC <u>GGATCC</u><br>CCGATGGTTACATCTACGATC (BamHI)                               | Designed to amplify a 1283 bp upstream fragment of <i>donA</i> gene                                          |
| sigOK+2kR              | AGTC <u>CTGCAG</u><br>CGCTTTGACTTTGGGATAAGTC (PstI)                               |                                                                                                              |
| sigOK-2kL              | AGTC <u>CTGCAG</u><br>CACATCTATTTGGCACTAATCG (PstI)                               | Designed to amplify a 1231 bp downstream fragment of <i>donA</i> gene                                        |
| sigOK-2kR              | GCAT <u>AAGCTT</u> TAACGCAAAGAATTC                                                |                                                                                                              |
| Omp117rtL              | GGTGAAGGCATTTCCGACTT                                                              | Designed to amplify a 140 bp fragment of <i>donC</i> gene for quantitative PCR                               |
| Omp117rtR              | TTGCCTTCCTGCCCTTTCTT                                                              |                                                                                                              |
| 16srL                  | GATGCGTTCCATTAGGTTGTTG                                                            | Designed to amplify a 127 bp fragment of 16s ribosomal RNA gene for quantitative PCR                         |
| 16srR                  | CACTGCTGCCTCCCGTAG                                                                |                                                                                                              |
| anti-sigOK+2kL         | CACG <u>AAGCTT</u> GCGTACAGTA (HindIII)                                           | Designed to amplify a 1393 bp upstream fragment of <i>donB</i> gene                                          |
| anti-sigOK+2kR         | AGTC <u>CTGCAG</u><br>GGCAAACAGACGGATGATTC (PstI)                                 |                                                                                                              |
| anti-sigOK-2kL         | AGTC <u>CTGCAG</u><br>GTTGTGGGAGGATTCAGTCAT (PstI)                                | Designed to amplify a 1296 bp downstream fragment of <i>donB</i> gene                                        |
| anti-sigOK-2kR         | AGTC <u>GGATCC</u><br>CTCCGTATTGTTGGAGATCGA (BamHI)                               |                                                                                                              |
| sigOK-340L             | AGTC <u>GGATCC</u> AAATAAGAAACAATT<br>ATGATTTTAAATAACGAGTCTAATAAGAA<br>G (BamHI)  | Designed to amplify the <i>donA</i> gene with the <i>ahpC</i> gene ribosomal binding site upstream           |
| sigOK-340R             | AGTC <u>GAGCTC</u><br>AGGTGTGACTGATTACTCAA (SacI)                                 |                                                                                                              |
| sRNA117+L              | AGTC <u>GGATCC</u><br>GTCAGCCATTTCATTGTCAGA (BamHI)                               | Designed to amplify a 693 bp DNA fragment including <i>donS</i> sequence with its -7 "TTTG" change to "AAAC" |
| sRNA117+R<br>(AAACmut) | AAATAGACTTTAATCGATAAAAATTCATA<br>GAAAACAACGAATTTTGTGTTAAATCAT<br>AATATTTATTTCC    |                                                                                                              |
| sRNA117-L<br>(AAACmut) | GGAAATAAATATTATGATTTAACTAAA<br>ATTCGTTGTTT<br>TCTATGAATTTTTATCGATTAAAGTCTATT<br>T | Designed to amplify a 679 bp DNA fragment including <i>donS</i> sequence with its -7 "TTTG" change to "AAAC" |
| sRNA117-R              | AGTC <u>GGATCC</u><br>CTGCTGAACACTGTA ACTCA (BamHI)                               |                                                                                                              |
| sRNA117-L              | TTGTCTCTTATCTCCTAATGCCTTACTTTT<br>GCATCCCGAATTTTAGTGTTAAATCATAA<br>TATTTATTTCC    | Designed to amplify the <i>donS</i> sequence with an 82 bp 16s rRNA promoter fragment                        |
| sRNA117-R1             | AGTC <u>GAGCTC</u><br>GGATTCAGTCATGAACTGAAG (SacI)                                |                                                                                                              |

|             |                                                                                               |                                                                 |
|-------------|-----------------------------------------------------------------------------------------------|-----------------------------------------------------------------|
| 16sPR-36-82 | AGTCCTGCAGTTTACGTTTTTATTCAAAA<br>TATTTTCAAAAAAATCCCCTTTTATATTTG<br>TCTCTTATCTCCTAATGCC (PstI) | sequence tagged<br>upstream.                                    |
| DonSP       | GCCACCTGATTCCGGATATGAAATCTGA<br>AT                                                            | Probe for small RNA<br>DonS                                     |
| 0549P       | GGTGGCACACTTCCGGCTCCGGGTAAAC<br>AA                                                            | Probe for small RNA<br>sr0549                                   |
| 1041P       | CCTTGTGAGCTTGTTTGGCGACAAGCTG<br>AGA                                                           | Probe for small RNA<br>sr1041                                   |
| 1270P       | GGTCTGGTACACCTTCCCTCCCGATAA<br>AGTCAA                                                         | Probe for small RNA<br>sr1270                                   |
| 1469P       | TGAGAATGCCGATAGGTGTTCCCGCACC<br>TA                                                            | Probe for small RNA<br>sr1469                                   |
| 1035P       | ATTGGCGTATCTACCTGTATGAAAGTCCA<br>CCGTC                                                        | Probe for small RNA<br>sr1035                                   |
| 2917P       | ACATATTGGGGTATGTCCTCCGATTCAG<br>AA                                                            | Probe for small RNA<br>sr2917                                   |
| 3123P       | CACCCATTTCCGATCCCCGAAATCAATC<br>AA                                                            | Probe for small RNA<br>sr3123                                   |
| 3597P       | CTGAGTTTTTTAATCACGTCTCTTGCGAG<br>GAGGCGC                                                      | Probe for small RNA<br>sr3579                                   |
| 3604P       | CCTCATATCATCCAACCCTGATTAGATT<br>AAACTACG                                                      | Probe for small RNA<br>sr3604                                   |
| 4145P       | CAGATGCGCCAACACCTGCCAACCTCGG<br>GT                                                            | Probe for small RNA<br>sr4145                                   |
| 3787P       | AGACTTTGGACGGAATATACCCCCTCGC<br>CCTACGCCTT                                                    | Probe for small RNA<br>sr3787                                   |
| 3799P       | GGTACTGCAATACCTGCCAGCTAAAAGG<br>AGAAACATTCTTCTTTTCCC                                          | Probe for small RNA<br>sr3799                                   |
| 3821P       | GGGTGAGCGCTACCAACACTCACCCCA<br>AAAG                                                           | Probe for small RNA<br>sr3821                                   |
| 5srRNAP     | CACTGTTACGCAGTACCATCGGCGTGAT<br>CA                                                            | Probe for the 5s<br>ribosomal RNA                               |
| DonS-L      | AGT ATC CGG AAA GAG GCG G                                                                     | qRT-PCR primer pair to<br>measure the sRNA<br>DonS              |
| DonS-R      | CCC AAA AAG TAA AGC ATA AGC<br>TTT AAC G                                                      |                                                                 |
| Sr1035L     | ACAGGAAGATATTGGCGTATCT                                                                        | qRT-PCR primer pair to<br>measure the donS –like<br>sRNA sr1035 |
| Sr1035R     | ATT CTA TTT GCC GCA CAG TTT GT                                                                |                                                                 |
| Sr1041L     | TGG AAA GAT ATT GGC GTA TCT<br>AAT CC                                                         | qRT-PCR primer pair to<br>measure the donS –like<br>sRNA sr1041 |
| Sr1041R     | TTTATCTCAGCTTGTCGCCAAAC                                                                       |                                                                 |
| Sr1270L     | AGG AAA TGG TCT GGT ACA                                                                       | qRT-PCR primer pair to<br>measure the donS –like<br>sRNA sr1270 |
| Sr1270R     | TAATAAGGTTAATACTTTGTTGTTTTT<br>TTATTTGGCTC                                                    |                                                                 |
| Sr1496L     | AAG TTA ACC TAT TGA GAA TGC                                                                   | qRT-PCR primer pair to                                          |

|           |                                           |                                                                                           |
|-----------|-------------------------------------------|-------------------------------------------------------------------------------------------|
|           | CGA T                                     | measure the donS –like sRNA sr1496                                                        |
| Sr1496R   | ATA AAA AAT TGT GTT GAT TTC TTA<br>TGC C  |                                                                                           |
| Sr3123L   | CAATTAATACTGTTTAAAGTCTCTAAA<br>GG         | qRT-PCR primer pair to measure the donS –like sRNA sr3123                                 |
| Sr3123R   | GAA CCG GAA ACA AAT TAC CAC A             |                                                                                           |
| Sr3597L   | AAA GTA AAT TGC GCC TCC TGC               | qRT-PCR primer pair to measure the donS –like sRNA sr3597                                 |
| Sr3597R   | ATA GGT AAA TGT TGC AGC ACT<br>TAC C      |                                                                                           |
| Sr3787L   | AAA TTT AAG GCG TAG GGC GAG               | qRT-PCR primer pair to measure the donS –like sRNA sr3787                                 |
| Sr3787R   | AAA AGT AGG GAA GGG GAA ATA<br>GAC T      |                                                                                           |
| Sr3821L   | GTG AGC GCT ACC AAC ACT CA                | qRT-PCR primer pair to measure the donS –like sRNA sr3821                                 |
| Sr3821R   | TAC TAT AGG TCT GTT TCG AGA<br>TGG A      |                                                                                           |
| Sr4145L   | TCT GAA TTT TTG AAA GGG TTT GGA<br>ATA CG | qRT-PCR primer pair to measure the donS –like sRNA sr4145                                 |
| Sr4145R   | TCG GCA GAT GCG CCA ACA                   |                                                                                           |
| donC-L-NB | CGT AGG CTA TAC CAC CCA ATA               | Designed to amplify a 328 bp fragment of <i>donC</i> gene as northern hybridization probe |
| donC-R-NB | GTC CAC TAC GTA GAG CAC ATT               |                                                                                           |
| donG-L-NB | CGA GAA CTG CAC CTT TGA A                 | Designed to amplify a 330 bp fragment of <i>donG</i> gene as northern hybridization probe |
| donG-N-NB | TTG GCT GTG AAG TTG CCA T                 |                                                                                           |

<sup>a</sup> Restriction site sequences if present are underlined.



**Supplemental Table 2. Construction and sequence of the random sRNA molecule (rdm).**

| Designation                                                                                                                                                                                                                                                                                                                                                                                           | Sequence                                                                                                                                   |
|-------------------------------------------------------------------------------------------------------------------------------------------------------------------------------------------------------------------------------------------------------------------------------------------------------------------------------------------------------------------------------------------------------|--------------------------------------------------------------------------------------------------------------------------------------------|
| rdm sequence <sup>a</sup>                                                                                                                                                                                                                                                                                                                                                                             | CAGGTAGATTATGTAAGTTGAGAGATGCAGGAAAAGTTCTTAACC<br>TTTCATAGGACGTGAACTTATTCTCTAATAGAGCTGGTTCATCCC<br>TTTCGGTCGAAAGACCGAAGGGGATGACTTGTTTTATGCC |
|                                                                                                                                                                                                                                                                                                                                                                                                       | <b>Primers</b>                                                                                                                             |
| Rdm-L                                                                                                                                                                                                                                                                                                                                                                                                 | CAGGTAGATTATGTAAGTTGAGAGATGCAGGAAAAGTTCTTAACC<br>TTTCATAGGACGTGAACTTATTCTCTAAT                                                             |
| Rdm-R                                                                                                                                                                                                                                                                                                                                                                                                 | GGCATAAAACAAGTCATCCCCTTCGGTCTTTCGACCGAAAGG<br>GATGAACCAGCTCTATTAGAGAATAAGTTCACGTCC                                                         |
| Rdm-L-L                                                                                                                                                                                                                                                                                                                                                                                               | TTGTCTTTATCTCCTAATGCCTTACTTTTGCATCCCAGGTAGATT<br>ATGTAAGTTGAGAGA                                                                           |
| Rdm-R-R                                                                                                                                                                                                                                                                                                                                                                                               | AGTC <u>GAGCTC</u> GGCATAAAACAAGTCATCCCCTTCGGTCTTTCG<br>(Sacl)                                                                             |
| 16sPR-36-82                                                                                                                                                                                                                                                                                                                                                                                           | AGTC <u>CTGCAG</u><br>TTTACGTTTTTATTCAAATATTTTCAAAAAAATCCCCTTTTATATTT<br>GTCTTTATCTCCTAATGCC (PstI)                                        |
| <b>Construction Strategy</b>                                                                                                                                                                                                                                                                                                                                                                          |                                                                                                                                            |
| Oligonucleotide primers used in the synthesis of random sRNA (rdm) are listed above. Rdm-L and Rdm-R have a complementary region shown by the blue text. To construct the rdm sequence the Rdm-L and Rdm-R primers were incubated together in the thermal cycler for 30 cycles and the PCR product was extracted from an agarose gel. Using this PCR product as a template, a second round of PCR was |                                                                                                                                            |

performed with the primer pair Rdm-L-L/Rdm-R-R. These primers added a SacI restriction site at the 3' end of the sequence and they added about half of the 16S rRNA promoter region to the 5' end of the molecule. This PCR product was extracted from an agarose gel and used in a third PCR reaction with the primer pair 16sPR-36-82/Rdm-R-R. The primer 16sPR-36-82 overlapped with a portion of the Rdm-L-L primer (shown in orange text). The primer 16sPR-36-/82 added the remainder of the 16S rRNA promoter and a PstI restriction site. This final PCR product was extracted from an agarose gel and cloned it into pFD340 between the PstI and SacI sites.

<sup>a</sup> Random sRNA sequence shown with the black and blue text and the 5s rRNA terminator region is in red text.

Supplemental Table 4. Properties of glycan hydrolases in the *B. fragilis* sRNA-associated PULs

| sRNA Designation | Approx. Size (nucleotides) | Cognate <i>susC</i> homolog        | Hydrolase and binding motifs associated with the PUL gene products                                                                                                                                | Potential substrates for PUL                     |
|------------------|----------------------------|------------------------------------|---------------------------------------------------------------------------------------------------------------------------------------------------------------------------------------------------|--------------------------------------------------|
| DonS             | 128                        | <i>donC</i> ( <i>BF638R_3439</i> ) | Endo- $\beta$ -N-acetylglucosaminidases (GH18); Concanavalin A/LamG binding motif                                                                                                                 | Complex N-linked serum glycoproteins (confirmed) |
| sr0549           | 100                        | <i>BF638R_0549</i>                 | $\alpha$ -glucosidase (GH31); $\alpha$ -galactosidase (GH36)                                                                                                                                      | Glycoproteins, O-glycans                         |
| sr1035           | 120                        | <i>BF638R_1035</i>                 | EEP domain nuclease/phosphatase; MPP family metalophosphate/hydrolase                                                                                                                             | Nucleic acids,                                   |
| sr1041           | 121                        | <i>BF638R_1041</i>                 | AsIA family arylsulfatase; AsIA family arylsulfatase                                                                                                                                              | Glycosaminoglycans                               |
| sr1270           | 108                        | <i>BF638R_1270</i>                 | MPP_DCR2 family metalophosphate; Alkaline phosphatase family (pyrophosphatase)                                                                                                                    | Nucleic acids, phosphoproteins                   |
| sr1496           | 102                        | <i>BF638R_1496</i>                 | $\alpha$ -galactosidase (GH27)                                                                                                                                                                    | Glycoproteins                                    |
| sr2917           | 78                         | <i>BF638R_2917</i>                 | $\beta$ -glucosidase (GH3); CmuC-like corrinoid methyltransferase; uroporphyrinogen decarboxylase; corrinoid methyltransferase; methionine synthase activation domain; $\beta$ -glucosidase (GH3) |                                                  |
| sr3123           | 109                        | <i>BF638R_3123</i>                 | Chitobiase (GH20); AsIA family arylsulfatase                                                                                                                                                      | N-Glycans, glycosaminoglycans                    |
| sr3597           | 99                         | <i>BF638R_3597</i>                 | MPP metalophosphate (partial) + pyrrolo-quinolone quinone (PQQ) domain; phosphodiesterase/pyrophosphatase Npp1 family; EEP-2 family exoDNase III                                                  | Nucleic acids                                    |
| srCcf            | 99                         | <i>ccfC</i> ( <i>BF638R_3604</i> ) | DUF 1735 (acylhydrolase associated); discoidin (factor V and VII) binding family, $\alpha$ -n-acetylglucosaminidase                                                                               | Phospholipid binding, glycolipids                |
| sr3787           | 98                         | <i>BF638R_3787</i>                 | Sialidase/neuraminidase; Sialidase/neuraminidase; MFS family carbohydrate transporter                                                                                                             | Glycoproteins, gangliosides                      |
| sr3799           | 100                        | <i>BF638R_3799</i>                 | AsIA family arylsulfatase; AsIA family arylsulfatase                                                                                                                                              | Glycosaminoglycan                                |
| sr3821           | 112                        | <i>BF638R_3821</i>                 | Xylanase domain (partial); Concanavalin A/LamG binding motif + EEP nuclease/phosphatase;                                                                                                          | Nucleic acids                                    |
| sr4145           | 99                         | <i>BF638R_4145</i>                 | Exo- $\beta$ -glucosaminidase or galactosidase (GH35)                                                                                                                                             | Hybrid N-glycans, glycosaminoglycans             |
